1 **Faecal DNA to the rescue: Shotgun sequencing of non-invasive samples reveals two**  
2 **subspecies of Southeast Asian primates to be Critically Endangered species**

3

4 Andie Ang<sup>1#</sup>, Dewi Imelda Roesma<sup>2#</sup>, Vincent Nijman<sup>3</sup>, Rudolf Meier<sup>4</sup>, Amrita Srivathsan<sup>4\*</sup>,  
5 Rizaldi<sup>2\*</sup>

6

7 <sup>1</sup>Raffles' Banded Langur Working Group, Wildlife Reserves Singapore Conservation Fund,  
8 Singapore 729826

9 <sup>2</sup>Department of Biology, Andalas University, Padang, West Sumatra 25163, Indonesia

10 <sup>3</sup>Department of Social Sciences, Oxford Brookes University, OX3 0BP, United Kingdom

11 <sup>4</sup>Department of Biological Sciences, National University of Singapore, Singapore 117543

12

13 #Co-first

14 \*Co-corresponding; [rizaldi@sci.unand.ac.id](mailto:rizaldi@sci.unand.ac.id), [asrivathsan@gmail.com](mailto:asrivathsan@gmail.com)

15

16 **Abstract**

17 A significant number of Southeast Asian mammal species described in the 19<sup>th</sup> and 20<sup>th</sup>  
18 century were subsequently synonymized and are now considered subspecies. Many are  
19 affected by rapid habitat loss and there is thus an urgent need to re-assess the conservation  
20 status based on species boundaries established with molecular data. However, such data are  
21 lacking for many populations and subspecies. We document via a literature survey and  
22 empirical study how shotgun sequencing of faecal DNA is a still underutilized but powerful  
23 tool for accelerating such evaluations. We obtain 11 mitochondrial genomes for three  
24 subspecies in the langur genus *Presbytis* through shotgun sequencing of faecal DNA (*P.*  
25 *femoralis femoralis*, *P. f. percura*, *P. siamensis* cf. *cana*). The genomes support the

26 resurrection of all three subspecies to species based on multiple species delimitation  
27 algorithms (PTP, ABGD, Objective Clustering) applied to a dataset covering 40 species and  
28 43 subspecies of Asian colobines. For two of the newly recognized species (*P. femoralis*, *P.*  
29 *percura*), the results lead to an immediate change in the IUCN status to Critically Endangered  
30 due to small population estimates and fragmented habitat. We conclude that faecal DNA  
31 should be more widely used for clarifying species boundaries in endangered mammals.

## 32 **Introduction**

33 Human impacts on the environment have rapidly accelerated species extinction via habitat  
34 degradation and climate change. Recent report by Intergovernmental Science-Policy Platform  
35 on Biodiversity and Ecosystem Services (IPBES) predicts that climate change has already  
36 affected the distribution of nearly half (47%) of land-mammals<sup>1</sup>. Conservation efforts are  
37 urgently needed but are hampered by the lack of data for a large number of mammal species,  
38 subspecies, and populations which face imminent extinction<sup>2,3,4</sup>. A typical example is Asian  
39 primates for which 70% of the species are threatened with extinction<sup>5</sup>. Effective conservation  
40 programs are needed but they require a robust understanding of species numbers and  
41 boundaries based on up-to-date taxonomic information<sup>6,7</sup>. Unfortunately, this information is  
42 lacking for many rare, globally threatened, and elusive mammalian species. Many lack  
43 molecular data and collecting these data is difficult because invasive sampling that would  
44 yield fresh tissues is often not feasible.

45 This leaves only three alternative sources of DNA. The first is museum specimens, but the  
46 number of samples in museums tends to be small and many were collected in the 19<sup>th</sup> or early  
47 20<sup>th</sup> century thus reflecting (historic) genetic diversity prior to extensive habitat loss. The  
48 second is tissue samples obtained from specimens that died of “natural causes” such as road  
49 accidents. The third source of genetic material is non-invasive samples such as hair and  
50 faeces. Arguably, faecal samples are still an underappreciated source of information although  
51 they could be collected in good numbers during routine field surveys. This can make faecal  
52 samples particularly useful for data-deficient taxa that are in urgent need for re-assessment of  
53 species boundaries. Faecal samples contain a complex pool of DNA including that of the  
54 host. The host DNA is particularly informative because it reflects the current genetic diversity  
55 of the species. However, many field research protocols still lack the collection of faecal  
56 samples although it is now straightforward to obtain complete mitochondrial genomes from

57 such samples using shotgun sequencing<sup>8,9</sup>. In this study, we document the power of faecal  
58 metagenomics for testing the species boundaries in two species of Asian primates that are  
59 listed as Data Deficient on the IUCN Red List of Threatened Species.

60 Asian colobines (langurs and odd-nosed monkeys) are a diverse group of mammals, with 55  
61 recognized species (87 spp.) belonging to seven genera (*Nasalis*, *Presbytis*, *Pygathrix*,  
62 *Rhinopithecus*, *Semnopithecus*, *Simias*, *Trachypithecus*)<sup>10</sup>; i.e., nearly half of all primate  
63 species in Asia are colobines. Unfortunately, many of these species are dependent on habitats  
64 that are quickly disappearing. Thus, nine species are already considered Critically  
65 Endangered, 23 are Endangered, and nine Vulnerable according to IUCN threat criteria<sup>5</sup>. This  
66 also applies to the genus *Presbytis* which is one of the most species-rich primate genera<sup>11</sup>.  
67 The 17 recognized species are found in the tropical rainforests of Sundaland, including the  
68 Malay Peninsula and the western Indo-Malay Archipelago<sup>12,13</sup>. Eleven species within  
69 *Presbytis* (*chrysomelas*, *comata*, *femoralis*, *frontata*, *hosei*, *melalophos*, *natunae*, *potenziani*,  
70 *rubicunda*, *siamensis*, and *thomasi*) were recognized in the last IUCN assessment<sup>14</sup>. The  
71 assessment predated the elevation of six subspecies to species (see Roos et al.<sup>10</sup>: *bicolor*,  
72 *canicrus*, *mitrata*, *sabana*, *siberu*, *sumatrana*) which suggests that many of the *Presbytis* taxa  
73 currently ranked as subspecies are in urgent need for re-assessment with molecular data.  
74 Unfortunately, these data are lacking for many subspecies and species which has serious  
75 consequences for the proper conservation assessment of these taxa.

76 Meyer et al.<sup>11</sup> presented the most comprehensive phylogenetic reconstruction of *Presbytis*  
77 which included 13 of the 17 recognized species. The analysis was based on two  
78 mitochondrial markers (*cyt-b* and *d-loop*). Of interest in this study is the banded langur *P.*  
79 *femoralis*, the relationship within which has been addressed by several studies. *Presbytis*  
80 *femoralis* is found on the Malay Peninsula and the island of Sumatra<sup>15</sup> (Fig. 1). The species

81 currently consists of three subspecies that were originally described as species because they  
82 are distinguishable based on a combination of morphological characters. However, many  
83 primatologists currently considered these characters insufficient for recognizing the three taxa  
84 as species (see Table 1).

85 The nominal species, *Presbytis femoralis*, was described by Martin (1838) based on  
86 specimens collected by Raffles (1821) from Singapore<sup>16,17</sup>. Raffles' banded langur *P. f.*  
87 *femoralis* occurs in southern Peninsular Malaysia and Singapore. East Sumatran banded  
88 langur *P. f. percura* (Fig. 2) occurs only in eastern Sumatra and was described by Lyon  
89 (1908) based on specimens collected from near Siak Kecil River, Makapan, Kompei, Pulau  
90 Rumat, and Salat Rumat<sup>18</sup>. Robinson's banded langur *P. f. robinsoni* was described by Thomas  
91 (1910) based on white phenotypic variants collected in Trang, southern Thailand<sup>19,20,21</sup>.  
92 However, typical *robinsoni* specimens are uniformly dark brown to black, with the inner side  
93 of upper arms, lower abdomen following onto the inside of the thighs to the heel being white.  
94 *Presbytis f. robinsoni* is widespread and ranges from northern Peninsular Malaysia to  
95 southern Thailand and Myanmar.

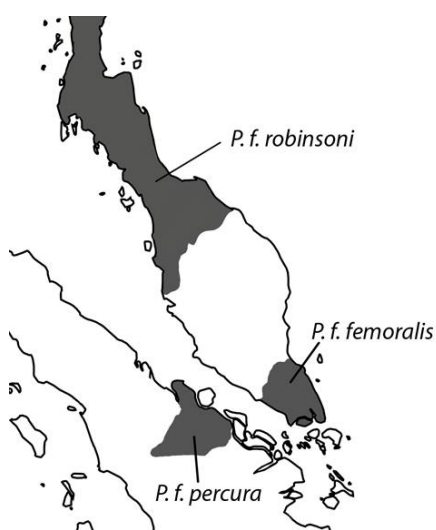

96  
97 Figure 1.

98

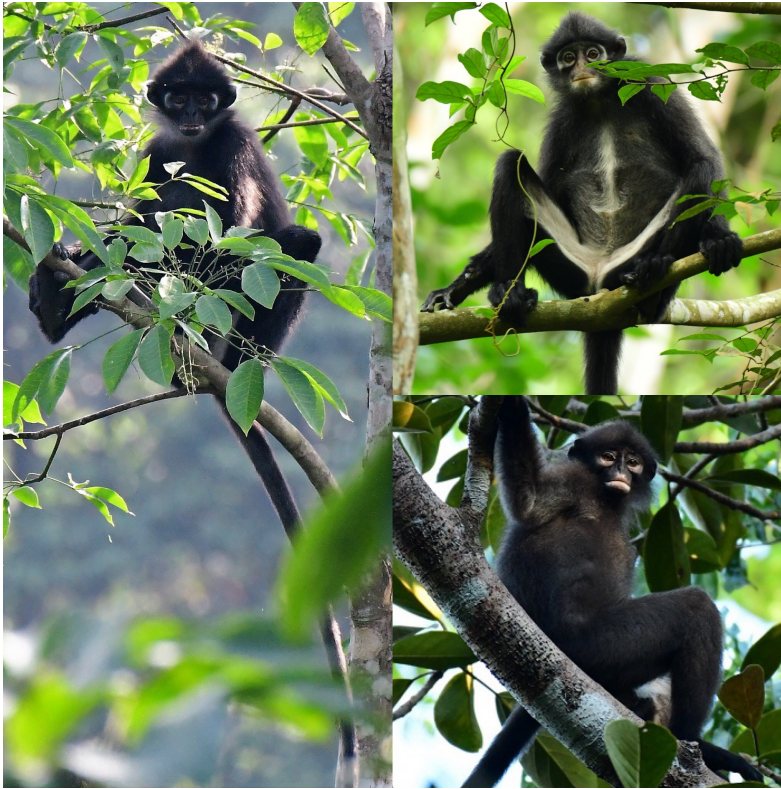

99

100 Figure 2.

101

102 Table 1.

|                             | <i>femoralis</i>                                                                                                                                                      | <i>percura</i>                                                                                                                                                            | <i>robinsoni</i>                                                                                                                                        |
|-----------------------------|-----------------------------------------------------------------------------------------------------------------------------------------------------------------------|---------------------------------------------------------------------------------------------------------------------------------------------------------------------------|---------------------------------------------------------------------------------------------------------------------------------------------------------|
| Fur coat                    | Less dark; dusky greyish brown on the top of the head, the back, and the shoulders to the elbows                                                                      | Less dark; upper parts of the head, the body, the feet, the hands, and the tail are black                                                                                 | Darkest; uniformly dark brown to black                                                                                                                  |
| Amount of white on body     | The chin, a line down the chest and abdomen, the inside of the humeri from the axilla, and the inside of the thighs                                                   | The belly, a narrow line on the chest, the inner side of thighs extending to the heel, the inner side of arms from the axilla to the wrist, and the chin                  | The inner side of upper arms, lower abdomen following onto the inside of the thighs to the heel                                                         |
| Coloration of underparts    | Pale of variable extent, but at least leaving the postumbilical area pale; the pale marking follows onto the inner side of the leg as a well-defined (femoral) stripe | Not uniform dark brown from umbilical region to chin; anterior margin of pale postumbilical region not sharply defined; outer side of thigh often with some trace of gray | Uniform dark brown from umbilical region to chin; anterior margin of pale postumbilical area sharply defined; outer side of thigh without trace of gray |
| Number of whorls on crown   | A pair, with a long crest between, or one of the pair may be suppressed                                                                                               | One or (occasionally) a pair                                                                                                                                              | One or a pair                                                                                                                                           |
| Direction of hairs on chest | All directed backward                                                                                                                                                 | All directed backward                                                                                                                                                     | Directed more outward than backward on the sides of chest, and directed back in the midline of chest                                                    |

|                                      |        |                            |                      |
|--------------------------------------|--------|----------------------------|----------------------|
| Pale stripe on the underside of tail | Absent | Short and poorly developed | Very faint or absent |
| Condyllo-basal length of skull       | ~65mm  | at least 70mm              | at least 70mm        |
| Mandible                             | ~60mm  | ~68mm                      | ~68mm                |

103

104 References: Groves<sup>15</sup>; Martin<sup>16</sup>; Raffles<sup>17</sup>; Lyon<sup>18</sup>; Thomas<sup>19</sup>; Robinson and Kloss<sup>20</sup>; Weitzel et al.<sup>21</sup>; Miller<sup>72</sup>

105

106 *Presbytis femoralis*, encompassing all three subspecies, is listed as Vulnerable in the most

107 recent IUCN Red List assessment, with the nominate subspecies considered Endangered

108 because the known populations are restricted to small and isolated patches of forest. In

109 addition, one population from Singapore showed low genetic variability<sup>9,22</sup>. *Presbytis f.*

110 *robinsoni* is considered Near Threatened, while the least known and least studied subspecies

111 is *P. f. percura* which is currently Data Deficient<sup>23</sup>. Genetic data suggest that at least *P. f.*

112 *femoralis* and *P. f. robinsoni* are different species<sup>24,25</sup> which is also in agreement with the

113 aforementioned morphological characters. However, resolving all species-level boundaries

114 within banded langurs required data for *P. f. percura*.

115 For several reasons the species boundaries within *P. femoralis* remain poorly understood. The

116 main problem is the lack of molecular data for *P. f. percura*. However, even if the data were

117 available, a comprehensive analysis would still be difficult because the sequence data from

118 three published analyses were not submitted to public sequence repositories (cyt-b, 12S

119 rDNA, and d-loop)<sup>26,27,28</sup>. This means that currently the only publicly available molecular

120 data are for *P. f. femoralis* from the type locality in Singapore (KU899140)<sup>9</sup> and *P. f.*

121 *robinsoni* from Redang Panjang, Malaysia (DQ355299)<sup>29</sup>. Some additional molecular data

122 can be reconstructed based on a table published in Abdul-Latiff et al.<sup>28</sup> that lists the variable

123 d-loop sites for several species and subspecies (see Nijman<sup>25</sup>). The last complication is the

124 confusing nomenclatural changes. The authors proposed to replace the type species *P.*

125 *femoralis* (Martin 1838) with a junior synonym (*P. neglectus neglectus* Schlegel 1876)<sup>30</sup>

126 without considering the detailed information in Low and Lim<sup>31</sup> that explains why Martin is

127 the author of the name *femoralis* and Singapore the type locality of the species. Abdul-Latiff  
128 et al.<sup>28</sup>'s study furthermore violated its own proposed nomenclatural changes by retaining *P.*  
129 *f. percura* and *P. f. robinsoni* (see Nijman<sup>25</sup>).

130 Here, we solve these problems by providing the first mitogenomes of *P. f. percura* and thus  
131 addressing the taxonomic position of all three subspecies of banded langurs. We also obtain  
132 the first mitogenome of the Riau pale-thighed langur *P. siamensis* cf. *cana* from Sumatra  
133 which helps with resolving species limits within this species. Lastly, we provide an updated  
134 dated phylogenetic tree for Asian colobines based on mitochondrial genomes and survey the  
135 mammal literature to illustrate that faecal DNA is currently still an underutilized source of  
136 genetic information.

## 137 **Results**

### 138 *Survey of Zoological Record*

139 In order to investigate to what extent faecal samples have been used in addressing taxonomic  
140 problems, we surveyed the literature as captured in Zoological Record. We retrieved 1,852  
141 articles that mentioned faecal samples, but only a subset of 43 articles were also classified  
142 under Systematics/Taxonomy. Inspection of these records revealed only two studies that used  
143 faecal DNA for resolving species limits<sup>32,33</sup>.

144

### 145 *Sequence Data*

146 Illumina sequencing of faecal metagenomes yielded 60.3-69.7 million sequences for each  
147 sample from Sumatra (ESBL1-8, Pres2; Table 2). The data were combined with the Hi-Seq  
148 data for six samples from Singapore (BLM1-6)<sup>9</sup>. All data were quality trimmed using  
149 Trimmomatic<sup>34</sup> and complete mitochondrial genomes were obtained. One sample of



150 *Presbytis femoralis percura* ESBL\_7 had a low average coverage of <5X for the  
151 mitochondrial genome and was not analysed further.

152

153 Table 2.

| Sample ID | Location                         | Organism                                   | Raw/trimmed (millions) | Average mitochondrial coverage (X) |
|-----------|----------------------------------|--------------------------------------------|------------------------|------------------------------------|
| ESBL_1b   | Kampar                           | <i>Presbytis femoralis percura</i>         | 60.33/58.81            | 25.205                             |
| ESBL_5    | Bengkalis                        | <i>Presbytis femoralis percura</i>         | 63.38/61.74            | 5.155                              |
| ESBL_6a   | Bengkalis                        | <i>Presbytis femoralis percura</i>         | 67.04/66.61            | 8.721                              |
| ESBL_8b   | Bengkalis                        | <i>Presbytis femoralis percura</i>         | 69.69/67.98            | 13.275                             |
| Pres2     | Kampar                           | <i>Presbytis siamensis</i> cf. <i>cana</i> | 67.37/65.69            | 9.358                              |
| BLM1      | Central Catchment Nature Reserve | <i>Presbytis femoralis femoralis</i>       | 107.68/92.35           | 21.794                             |
| BLM2      | Central Catchment Nature Reserve | <i>Presbytis femoralis femoralis</i>       | 72.66/60.18            | 19.716                             |
| BLM3      | Central Catchment Nature Reserve | <i>Presbytis femoralis femoralis</i>       | 85.96/74.05            | 15.029                             |
| BLM4      | Central Catchment Nature Reserve | <i>Presbytis femoralis femoralis</i>       | 66.99/56.88            | 37.606                             |
| BLM5      | Central Catchment Nature Reserve | <i>Presbytis femoralis femoralis</i>       | 68.19/56.15            | 104.315                            |
| BLM6      | Central Catchment Nature Reserve | <i>Presbytis femoralis femoralis</i>       | 76.44/65.11            | 12.708                             |

154

### 155 *Species Delimitation*

156 Pairwise comparison of cyt-b, hypervariable region HV1 of the d-loop and mitochondrial  
157 genomes (CDS+rDNA+d-loop) revealed minimum genetic divergence of 7.1%, 6.1% and  
158 5.3% between *P. f. femoralis* and *P. f. percura*. On the other hand, the minimum pairwise  
159 distance between either these taxa with *P. f. robinsoni* is 6.0% for HV1, 10.3% for cyt-b and  
160 7.6% across the mitochondrial genome. For the two subspecies of *P. siamensis*, we were only  
161 able to compare HV1 sequences. The HV1 sequence of *P. s. cf. cana* is 11.1% diverged from  
162 *P. s. siamensis* and 5.1% from *P. melalophos* (KY117602), while cyt-b and complete  
163 mitochondrial genomes show divergence of 2.8% and 2.5% between sequences from *P. s. cf.*  
164 *cana* and *P. mitrata/P. melalophos*. Overall, these results suggest that *P. s. cf. cana*  
165 represents a genetically distinct *Presbytis* lineage.

166 The high genetic distances are consistent with results of species delimitation using Poisson  
167 Tree Processes (PTP)<sup>35</sup>, Automated Barcode Gap Discovery (ABGD)<sup>36</sup> and Objective  
168 Clustering<sup>37</sup>. PTP consistently split *P. f. femoralis* and *P. f. percura* into different molecular

169 Operational Taxonomic Units (mOTUs) across the three datasets examined (Asian colobine  
 170 mitogenome and *Presbytis* mitogenome+cyt-b+HV1, and *Presbytis* HV1-only datasets)  
 171 (Supplementary Figs. S1-3). ABGD and Objective Clustering (thresholds 2-4%) similarly  
 172 split these two subspecies across different datasets (Asian colobine mitogenome, *Presbytis*  
 173 HV1 and cyt-b) and a range of parameters (Table 3). For ABGD, these subspecies would  
 174 only lump if unusually high priors for intraspecific divergences were used (priors $\geq$ 0.0215).  
 175 These parameters are not likely to be appropriate because they also led to collapse of many  
 176 recognized *Presbytis* species into a single mOTU. All three species delimitation methods also  
 177 placed *P. f. robinsoni* as a distinct species from *P. f. femoralis* and *P. f. percura*. Lastly, *P. s.*  
 178 cf. *cana* was placed as a distinct species using PTP and ABGD unless inappropriately high  
 179 priors for intraspecific divergence are used in ABGD. Objective Clustering based on HV1  
 180 also identified *P. s. cf. cana* as a distinct species. However, the mitogenome and cyt-b  
 181 datasets lumped *P. s. cf. cana* with *P. melalophos* and *P. mitrata* at 3% and 4% thresholds.

182 We observed further species-level splitting when species delimitation was based on only HV1  
 183 data for the subspecies of *P. femoralis*. This dataset included sequences for multiple  
 184 individuals of *P. f. femoralis*, *P. f. robinsoni* and *P. s. siamensis* from the Malay Peninsula  
 185 (reconstructed in Nijman<sup>25</sup>, based on Abdul Latiff et al.<sup>28</sup>). At low prior intraspecific  
 186 divergences, ABGD split some haplotypes of *P. f. femoralis* from the Malay Peninsula as  
 187 separate mOTUs from other haplotypes of the same subspecies from the same region. These  
 188 however consistently grouped together as single mOTU at higher thresholds. Similarly, PTP  
 189 based analyses of only HV1 data split haplotypes of *P. f. robinsoni* into multiple mOTUs  
 190 (Fig. S2) while ABGD consistently placed them as a single species.

191 Table 3.

| Prior intraspecific divergence | cyt-b, N=16 |       |     | HV1, N=17 |       |     | Mitogenome, N=33 |       |     |
|--------------------------------|-------------|-------|-----|-----------|-------|-----|------------------|-------|-----|
|                                | X=0.1       | X=0.5 | X=1 | X=0.1     | X=0.5 | X=1 | X=0.1            | X=0.5 | X=1 |
| 0.0010                         | 21          | 21    | 21  | 26        | 26    | 24  | 33               | 33    | 33  |

|        |    |    |    |  |    |    |    |  |    |    |    |
|--------|----|----|----|--|----|----|----|--|----|----|----|
| 0.0017 | 21 | 21 | 21 |  | 26 | 26 | 24 |  | 33 | 33 | 33 |
| 0.0028 | 20 | 20 | 20 |  | 26 | 26 | 24 |  | 33 | 33 | 33 |
| 0.0046 | 20 | 20 | 20 |  | 23 | 23 | 21 |  | 33 | 33 | 33 |
| 0.0077 | 20 | 20 | 20 |  | 21 | 21 | 21 |  | 31 | 31 | 22 |
| 0.0129 | 20 | 20 | 20 |  | 21 | 21 | 21 |  | 19 | 19 | 21 |
| 0.0215 | 18 | 18 | NA |  | 11 | 1  | NA |  | 19 | 19 | 21 |
| 0.0359 | 8  | NA | NA |  | NA | NA | NA |  | 12 | 11 | 7  |

192

193 *Mitochondrial Phylogeny of Asian Colobines and Genus Presbytis*

194 The phylogenetic reconstruction based on mitochondrial genomes of Asian colobine dataset  
195 revealed that *P. femoralis* is polyphyletic (Fig. 3). The reconstructions based on Maximum  
196 Likelihood (ML) and Bayesian Inference (BI) are congruent and reveal that *P. f. femoralis*  
197 and *P. f. percura* are sister taxa. Divergence time estimates dated the split of *P. f. femoralis*  
198 and *P. f. percura* at 2.6 Mya (CI: partitioning by codon: 1.96-3.35 Mya, partitioning by gene  
199 1.90-3.37 Mya (Supplementary Fig. S4)). This clade is sister to clade comprising of *P.*  
200 *mitrata*, *P. comata*, *P. siamensis* cf. *cana*, and *P. melalophos*. *Presbytis f. robinsoni* diverged  
201 from these species at 4.5 Mya (CI: partitioning by codon: 3.49-5.48 Mya, partitioning by  
202 gene 3.46-5.62). Overall, the mitochondrial phylogeny reveals high support for clade  
203 comprising of *Presbytis* and *Trachypithecus* as well as all the relationships within the  
204 (((*Simias*+*Nasalis*)+*Pygathrix*)+*Rhinopithecus*) clade. Only the placement of *Semnopithecus*  
205 remains uncertain, as revealed by low support for its relationship to the clade comprising of  
206 *Nasalis*, *Simias*, *Pygathrix* and *Rhinopithecus* on the ML tree. This result is different from  
207 Wang et al.<sup>38</sup>, who found high support for a sister group relationship of *Semnopithecus* to all  
208 the other genera of Asian colobines. However, a combined analysis of nuclear and  
209 mitochondrial data placed *Semnopithecus* differently thus suggesting our mt-genome  
210 phylogeny correctly reflects that the placement of *Semnopithecus* remains uncertain.

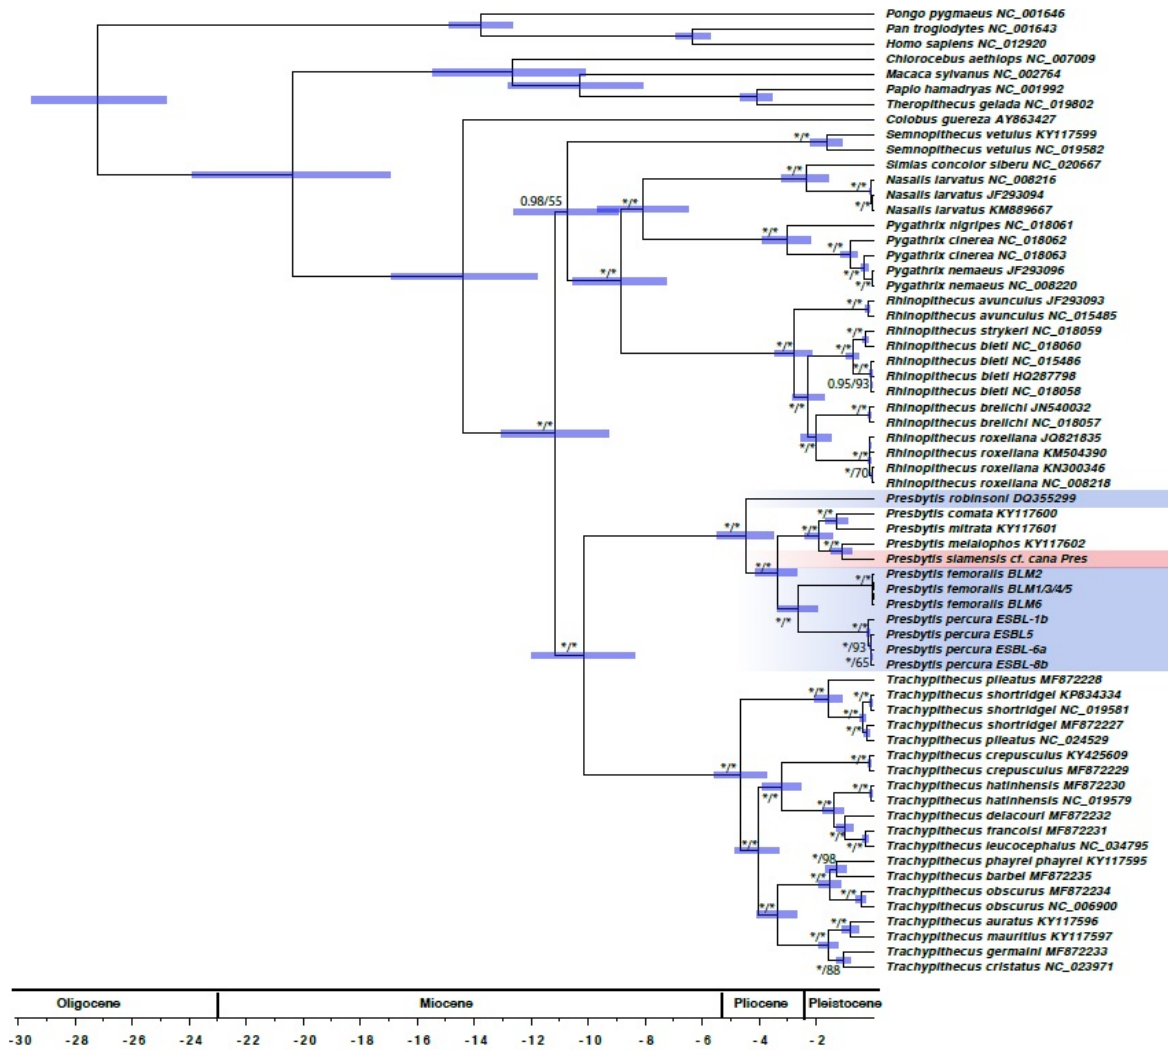

211

212 Figure 3.

213

214 With regard to the phylogenetic relationships within *Presbytis*, our results on *Presbytis*

215 mitogenome+cyt-b+HV1 dataset (Fig. 4) are largely consistent with the reconstruction by

216 Meyer et al.<sup>11</sup>. The only differences are as follows: low support for a clade comprising of *P.*

217 *comata*, *mitrata*, *melalophos*, *bicolor*, *sumatrana*, *rubicunda* and *P. siamensis* cf. *cana* but

218 resolution for *P. rubicunda*, *melalophos*, *mitrata* and *bicolor* which formed a trichotomy in

219 Meyer et al.<sup>11</sup>. Here, we found *P. rubicunda* to be sister to *P. bicolor*. *Presbytis f. femoralis*

220 and *P. f. percura* remain sister taxa. Both taxa combined are more closely related to *P.*

221 *mitrata*, *P. comata* and several other taxa of *Presbytis* than *P. f. robinsoni*. The split between

222 *P. f. femoralis* and *P. f. percura* is again deeper than for most recognized taxa of *Presbytis*.  
223 Divergence estimates based on cyt-b for this taxon set revealed deeper divergence times as  
224 compared to mitochondrial genomes, but with overlapping confidence intervals. *Presbytis f.*  
225 *femoralis* and *P. f. percura* split 2.93 Mya (2.09-3.78 Mya) (Supplementary Fig. S5), while *P.*  
226 *f. robinsoni* diverged from the clade comprising of *P. femoralis*, *potenziani*, *mitrata*,  
227 *melalophos*, *bicolor*, *sumatrana* and *P. siamensis* cf. *cana* at 5.47 Mya (CI: 4.28-6.66 Mya).

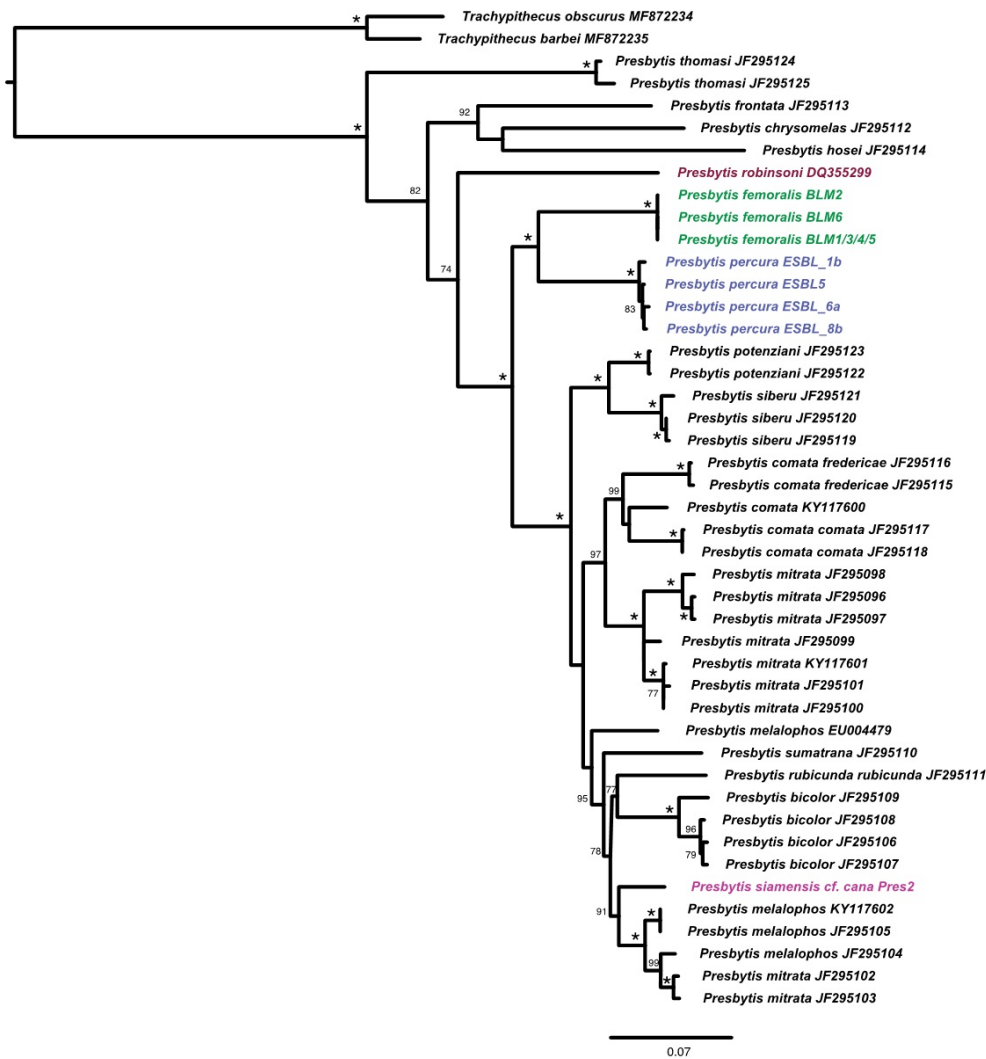

228  
229 Figure 4.

230  
231 **Discussion**

232 The species limits of many Southeast Asian mammal taxa remain unclear which interferes  
233 with a timely conservation assessment although many populations, subspecies, and species

234 face extinction. We here demonstrate how such taxonomic uncertainty can be addressed  
235 rapidly through shotgun sequencing of faecal DNA. We document the power of the approach  
236 by studying langur species in *Presbytis* Eschscholtz, 1821 which continue to undergo many  
237 changes that significantly affect the conservation status of many taxa. At one point all Asian  
238 langurs and leaf monkeys in *Presbytis*, *Semnopithecus*, and *Trachypithecus* were included in  
239 *Presbytis* and only five widespread species were recognized (*P. aygula*, *P. melalophos*, *P.*  
240 *frontata*, *P. potenziani*, *P. rubicunda*)<sup>39,40,41</sup>. This has dramatically changed over the last 20  
241 years and currently three genera and 45 species are recognized (17 spp. in *Presbytis*; eight  
242 spp. in *Semnopithecus*; 20 spp. in *Trachypithecus*)<sup>5,10</sup>. Many of these changes in species  
243 boundaries were based on newly-obtained genetic data which allowed for the application of  
244 explicit species delimitation methods. These new data and analyses revealed that many taxa  
245 that were initially described as species and later downgraded to subspecies diverged well  
246 before the Pleistocene and should be recognized as species; i.e., the morphological characters  
247 that were used for the initial species descriptions were appropriate for the delimitation of  
248 species and the subsequent lumping was not justified.

249

#### 250 *Resurrection of Presbytis femoralis, P. percura and P. robinsoni*

251 Based on multiple species delimitation methods, high genetic divergence, placement in the  
252 mitochondrial phylogenies, as well as distinct morphological differences, we here resurrect  
253 the three species of *P. femoralis* from their current subspecific status (Table 4). The Raffles'  
254 banded langur *P. femoralis* is only known from southern Peninsular Malaysia (states of Johor  
255 and Pahang) and Singapore. The East Sumatran banded langur *P. percura* only occurs in Riau  
256 Province of east-central Sumatra. Lastly, Robinson's banded langur *P. robinsoni* has the  
257 widest distribution and ranges from northern Peninsular Malaysia (states of Kedah and Perak)  
258 through southern Thailand (provinces of Surat Thani, Phetchaburi, and Prachuap Khiri Khan)

259 to southern Myanmar (Tanintharyi Region). These changes to species status mean that  
260 *Presbytis* now comprises 19 species (Fig. 5).

261

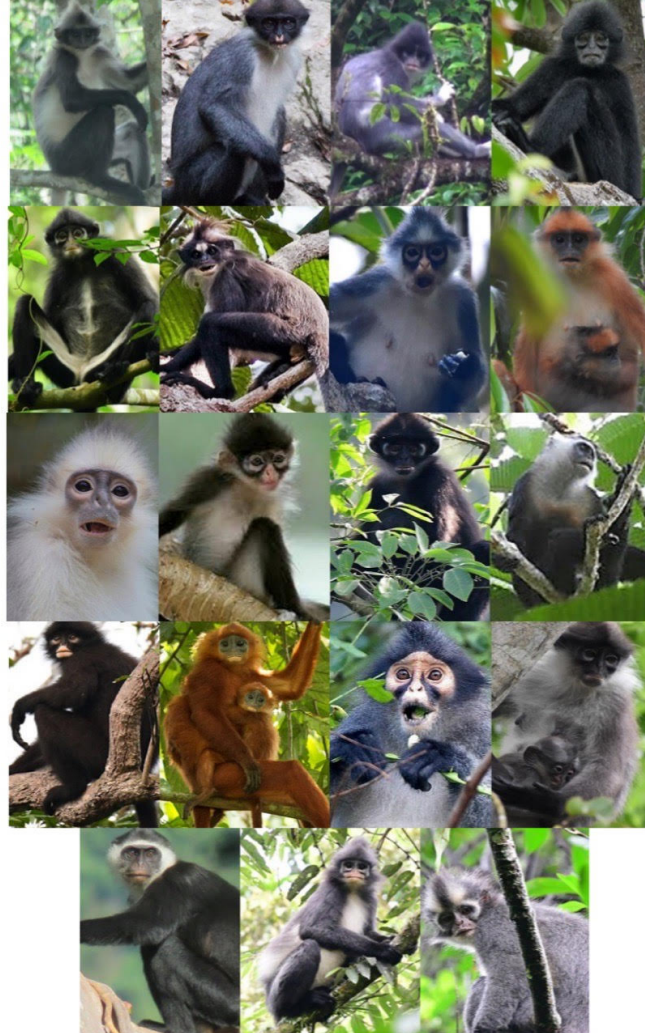

262

263 Figure 5.

264

265 A >5% genetic difference and divergence estimates of 2.6-2.9 Mya between *P. femoralis* and  
266 *P. percura* suggest that these two species radiated prior to the Pleistocene, while several other  
267 species of *Presbytis* diverged more recently. These results are particularly intriguing because  
268 the changing sea levels during Pleistocene would have increased connectivity between the  
269 land masses of Sumatra and Malay Peninsula. However, the Malacca Straits River flowing  
270 northwards with tributaries in what is now Sumatra and the Malay Peninsula<sup>42</sup> may have been

271 a substantial barrier between *P. femoralis* and *P. percursa*, as it would have been significantly  
 272 wider than the rivers that currently form the geographic barriers between some of the  
 273 *Presbytis* species in Sumatra. Furthermore, it has been argued that the land bridge had coarse  
 274 sandy and/or poorly drained soils which may have limited plant growth in central Sundaland.  
 275 Unsuitable vegetation may have acted as a dispersal barrier for rainforest plants and  
 276 animals<sup>43</sup>. These barriers could have kept the langur populations separate and it thus remains  
 277 unclear whether *P. femoralis* and *P. percursa* would have formed a hybrid population if they  
 278 had encountered each other. Note that it is known that recognized primate species in  
 279 *Trachypithecus* that radiated ~0.95-1.25 Mya can interbreed<sup>44,45</sup>, but the genetic divergence  
 280 between *P. femoralis* and *P. percursa* is considerably higher.

281

282 Table 4.

| Reference                       | <i>femoralis</i>                      | <i>percursa</i>                      | <i>robinsoni</i>                      |
|---------------------------------|---------------------------------------|--------------------------------------|---------------------------------------|
| Martin 1838 (16)                | <i>Semnopithecus femoralis</i>        | -                                    | -                                     |
| Lyon 1908 (18)                  | -                                     | <i>Presbytis percursa</i>            | -                                     |
| Thomas 1910 (19)                | -                                     | -                                    | <i>Presbytis robinsoni</i>            |
| Elliot 1913 (73)                | <i>Pygathrix femoralis</i>            | <i>Pygathrix percursa</i>            | <i>Pygathrix robinsoni</i>            |
| Miller 1913 (74)                | <i>Presbytis femoralis</i>            | -                                    | <i>Presbytis keatii</i>               |
| Miller 1934 (72)                | <i>Presbytis femoralis</i>            | <i>Presbytis percursa</i>            | <i>Presbytis keatii</i>               |
| Pocock 1934 (75)                | <i>Presbytis femoralis femoralis</i>  | <i>Presbytis melalophos percursa</i> | <i>Presbytis femoralis keatii</i>     |
| Raven 1935 (76)                 | <i>Presbytis femoralis</i>            | <i>Presbytis percursa</i>            | <i>Presbytis robinsoni</i>            |
| Chasen 1940 (77)                | <i>Pithecus femoralis femoralis</i>   | <i>Pithecus femoralis percursa</i>   | <i>Pithecus femoralis robinsoni</i>   |
| Hooijer 1962 (78)               | <i>Presbytis melalophos femoralis</i> | -                                    | -                                     |
| Medway 1970 (79)                | <i>Presbytis melalophos femoralis</i> | -                                    | <i>Presbytis melalophos robinsoni</i> |
| Thorington and Groves 1970 (80) | <i>Presbytis melalophos femoralis</i> | <i>Presbytis melalophos percursa</i> | <i>Presbytis melalophos robinsoni</i> |
| Wilson and Wilson 1977 (81)     | -                                     | <i>Presbytis femoralis percursa</i>  | -                                     |
| Medway 1983 (82)                | <i>Presbytis melalophos femoralis</i> | -                                    | <i>Presbytis melalophos robinsoni</i> |
| Brandon-Jones 1984 (83)         | <i>Presbytis femoralis femoralis</i>  | <i>Presbytis femoralis percursa</i>  | <i>Presbytis femoralis robinsoni</i>  |
| Napier 1985 (84)                | <i>Presbytis melalophos femoralis</i> | <i>Presbytis melalophos percursa</i> | <i>Presbytis melalophos robinsoni</i> |
| Weitzel et al. 1988 (21)        | <i>Presbytis femoralis femoralis</i>  | -                                    | <i>Presbytis femoralis robinsoni</i>  |
| Aimi and Bakar 1992 (85)        | -                                     | <i>Presbytis femoralis percursa</i>  | -                                     |
| Oates et al. 1994 (12)          | <i>Presbytis melalophos femoralis</i> | <i>Presbytis melalophos percursa</i> | <i>Presbytis melalophos robinsoni</i> |
| Groves et al. 2001 (15)         | <i>Presbytis femoralis femoralis</i>  | <i>Presbytis femoralis percursa</i>  | <i>Presbytis femoralis robinsoni</i>  |
| Brandon-Jones et al. 2004 (86)  | <i>Presbytis femoralis femoralis</i>  | <i>Presbytis femoralis percursa</i>  | <i>Presbytis femoralis robinsoni</i>  |
| Md.-Zain 2001 (87)              | <i>Presbytis melalophos femoralis</i> | -                                    | <i>Presbytis melalophos robinsoni</i> |
| Meyer et al. 2011 (11)          | <i>Presbytis femoralis femoralis</i>  | -                                    | <i>Presbytis femoralis robinsoni</i>  |
| Vun et al. 2011 (27)            | <i>Presbytis melalophos femoralis</i> | -                                    | <i>Presbytis melalophos robinsoni</i> |
| Roos et al. 2014 (10)           | <i>Presbytis femoralis femoralis</i>  | <i>Presbytis femoralis percursa</i>  | <i>Presbytis femoralis robinsoni</i>  |
| Abdul Latiff et al. 2019 (28)   | <i>Presbytis neglectus neglectus</i>  | <i>Presbytis femoralis percursa</i>  | <i>Presbytis femoralis robinsoni</i>  |
| This study                      | <i>Presbytis femoralis</i>            | <i>Presbytis percursa</i>            | <i>Presbytis robinsoni</i>            |

283 Grey boxes indicate the recognition of species rank for *Presbytis femoralis*, *P. percursa*, and *P. robinsoni*.

284

285 *Conservation Status of P. femoralis, P. percursa, and P. robinsoni*



286 In the most recent IUCN Red List assessment conducted in 2015, *Presbytis femoralis*  
287 (comprising *femoralis*, *percura* and *robinsoni*) was listed as Vulnerable A2cd A3cd A4cd  
288 (population size reduction of at least 30% over three generations based on a decline in area of  
289 occupancy, extent of occurrence and habitat quality, and actual or potential levels of  
290 exploitation). As part of this assessment the status of the three subspecies were also evaluated  
291 against the IUCN Red List criteria. *Presbytis f. femoralis* was considered Endangered A2cd  
292 A3cd A4cd, *P. f. percura* Data Deficient, and *P. f. robinsoni* Near Threatened (unpublished  
293 data from a Red List re-assessment in 2015). With their resurrection to species rank, the  
294 conservation status of each of the taxa requires re-assessment. *Presbytis femoralis* has a small  
295 global population size which continues to decline mainly due to habitat loss. There are 60  
296 individuals (48 mature individuals) in the Singapore population of *P. femoralis*<sup>46</sup>. There are  
297 no precise population estimates available for the conspecifics in the Malaysian states of Johor  
298 and Pahang, but it is believed that only a few hundred individuals remain (see Abdul-Latiff et  
299 al.<sup>28</sup>); i.e., the overall population of *P. femoralis* could well be <250 mature individuals.  
300 Furthermore, the extensive habitat loss especially to industrial oil palm plantations in  
301 southern Peninsular Malaysia is unlikely to cease in the near future (see Shevade et al.<sup>47</sup>;  
302 Shevade and Loboda<sup>48</sup>). Hence, based on a small population size and decline, we propose to  
303 list *P. femoralis* as Critically Endangered C2a(i) (<250 mature individuals, continuing  
304 population decline, and ≤50 mature individuals in each subpopulation).

305 *Presbytis percura* is only found in a number of isolated forests and faces extinction in the  
306 wild based on large-scale forest loss in Riau Province<sup>49</sup>. Riau experienced the highest rate of  
307 deforestation in Sumatra such that 63% of natural forest have been lost between 1985 and  
308 2008<sup>50</sup>. Additionally, forest fires linked to the ENSO events, and open burning of forest land  
309 for agricultural purposes destroy millions of hectares of land in Indonesia on an annual basis,  
310 and Riau is often one of the worst impacted areas, owing in part to its high concentration of

311 peatland<sup>51</sup>. We thus infer that the area of occupancy, extent of occurrence and quality of  
312 habitat of *P. percura* have declined such that their population size has reduced by  $\geq 80\%$  over  
313 the last three generations since 1989 (30 years approximately; see Nijman and Manullang<sup>52</sup>  
314 for the closely-related *P. melalophos*), thus fulfilling the IUCN criteria for Critically  
315 Endangered A2cd A3cd A4cd.

316 *Presbytis robinsoni* ranges from northern Peninsular Malaysia through southern Thailand to  
317 southern Myanmar. There are no population estimates (either recent or in the past), but some  
318 of the species' habitat continues to be converted for agriculture (primarily oil palm) and it is  
319 also targeted for illegal pet trade. Overall, it cannot be evaluated on small population size  
320 and/or restricted population criteria, but *P. robinsoni* is certainly a taxon of conservation  
321 concern and is here considered as Near Threatened.

#### 322 *An Urgent Need for Molecular Data for Additional Presbytis Populations*

323 Our results highlight the need for sampling multiple populations of *Presbytis* species and  
324 subspecies because even our limited fieldwork already provided strong evidence for the  
325 widespread presence of cryptic diversity or inappropriate synonymization within *Presbytis*.  
326 Additional data are also needed in order to be able to precisely assign samples. We collected  
327 one faecal sample that was suspected to come from an individual of *P. siamensis* cf. *cana*.  
328 However, its placement in the phylogeny reveals that it belongs to a genetically distinct  
329 lineage that is more closely related to *P. melalophos*+*mitrata* than *P. s. siamensis*  
330 (Supplementary Fig. S2). If the sample was indeed from *P. s. cana*, then the taxonomy of the  
331 pale-thighed langur *P. siamensis*, which currently comprises of four subspecies, needs to be  
332 revisited unless the unexpected signal is due to introgression via the hybridization of two  
333 species. Regardless of the explanation, the taxon represented by the sample deserves species  
334 status, but the correct scientific name and range limits remain unclear because *P. s. paenulata*

335 and *P. s. rhionis* still lack molecular data. Even if the faecal sample originated from  
336 individual of *P. melalophos/mitrata*, its genetic distinctness suggests that these species  
337 require more attention from taxonomists. In addition, it would mean that the geographic  
338 ranges of the species need to be revised because the species are unknown from the place of  
339 collection. Overall, either explanation is reasons for concern. Geographically, only *P. s.*  
340 *siamensis* (Fig. 6; left photo) has a wide distribution on the Malay Peninsula while the  
341 remaining three subspecies have narrow distributions. *Presbytis s. cana* (Fig. 6; right photo)  
342 occurs in eastern Sumatra and on Kundur Island, *P. s. paenulata* is found mainly in a small-  
343 wedge of coastal forest in east-central Sumatra, and *P. s. rhionis* has only been found on the  
344 islands of Bintan and Batam (but may also be found on Galang Island) in the Riau  
345 Archipelago<sup>10</sup>. Given the extensive habitat loss to oil palm plantations in Sumatra and large-  
346 scale economic development in Bintan and Batam, these taxa are likely highly threatened.  
347 Study is urgently needed and we submit that faecal samples would be the best way to rapidly  
348 address the species limits and distribution of these undersampled *Presbytis* species. We lack  
349 genetic data, even COI barcodes, for many subspecies of *Presbytis* and their distributions are  
350 poorly understood. Clearly, Southeast Asian langurs have received insufficient attention and  
351 broad surveys are needed that estimate population sizes while collecting faecal samples for a  
352 re-assessment of species boundaries.

353

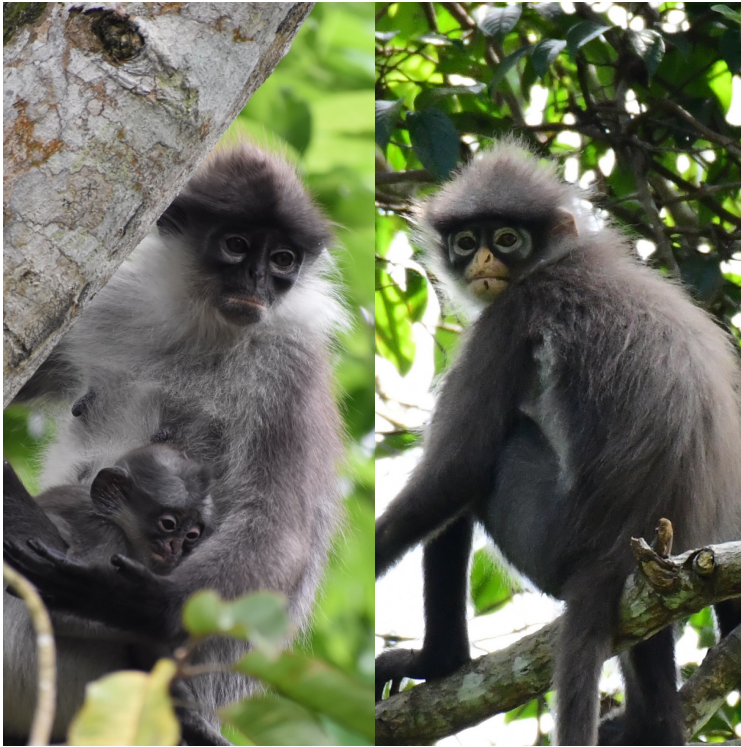

354

355 Figure 6.

356

### 357 *Mitochondrial Phylogeny of Presbytis*

358 In the process of delimiting species, we re-examined the phylogenetic relationships within

359 *Presbytis* by combining the data for mitochondrial genomes with the data generated by

360 Meyer et al.<sup>11</sup> for *cyt-b* and *d-loop-HV1*. This led to the resurrection of *P. femoralis* and *P.*

361 *percura* which are here revealed to be sister species and more closely related to several other

362 *Presbytis* species from Sumatra (and *P. rubicunda* in Borneo) than *P. robinsoni* from Malay

363 Peninsula. This placement of *P. femoralis* is in conflict with relationships proposed by

364 Abdul-Latiff et al.<sup>28</sup>, who obtained a clade comprising of *P. femoralis* + *P. robinsoni* + *P.*

365 *siamensis* which was sister species of the *Presbytis* species from Sumatra + *P. rubicunda*.

366 One limitation of our study is the lack of nuclear data for species delimitation and

367 reconstructing relationships (e.g. Wang et al.<sup>38</sup>). This is because mitochondrial data

368 represents matrilineage only. However, obtaining nuclear data from faecal samples remains

369 challenging partially due to the low concentration of primate DNA in faecal samples. We  
370 assessed the primate nuclear DNA content in these metagenomes and found that it was only  
371 0.09-3.13% of total DNA in the faecal samples (Table 5). However, we do not think that the  
372 lack of nuclear data seriously challenges our conclusions. Firstly, we reveal deep  
373 mitochondrial splits of >2 million years between *P. femoralis* and *P. percura*. We think that it  
374 would be more perilous to argue for the presence of one species based on identical  
375 mitochondrial sequence because it could be caused by introgression. Secondly, these splits  
376 are consistent with morphological data that allow for assigning specimens unambiguously to  
377 one of the lineages that are here re-corrected as species. Lastly, whatever limited information  
378 is available for Asian colobines does not point to widespread conflict between nuclear and  
379 mitochondrial signals. Wang et al.<sup>38</sup> presents phylogenetic reconstructions based on  
380 mitochondrial and nuclear markers for Asian colobines. Four of the six congeneric nodes are  
381 congruent between nuclear and mitochondrial data although they came from different  
382 individuals (i.e., study used data from multiple sources). Nonetheless, it is essential to  
383 develop new approaches for obtaining nuclear data from faecal samples (see Chiou and  
384 Bergey<sup>53</sup>).

385 Table 5.

| Sample ID | % host | % host after removal of human reads |
|-----------|--------|-------------------------------------|
| ESBL 1b   | 0.51   | 0.49                                |
| ESBL 5    | 0.62   | 0.59                                |
| ESBL 6a   | 0.23   | 0.21                                |
| ESBL 7    | 2.00   | 1.95                                |
| ESBL 8b   | 3.15   | 3.13                                |
| Pres 2    | 0.11   | 0.09                                |

386

387 *Non-invasive Samples for Species Discovery*

388 Seventeen (61%) of the 28 taxa of *Presbytis* are threatened (Vulnerable, Endangered, or

389 Critically Endangered) while five (18%) taxa are Data Deficient<sup>5,10</sup>. Many taxa continue to be

390 affected by habitat loss. This means that there is an urgency to resolve species limits in order  
391 to better assess their conservation status and needs. Molecular data play a critical role in  
392 resolving species limits, and here faecal samples are particularly valuable because they allow  
393 for accelerating data collection. Yet, our literature survey suggests that faecal DNA remains  
394 underutilized for taxonomic research with only two other published studies explicitly using  
395 faecal DNA as evidence for justifying decision on species status: nine members from a brown  
396 lemur complex were given species rank<sup>33</sup> and two subspecies of otters were elevated to  
397 species<sup>32</sup>. Faecal samples yield DNA that are valuable not only for taxonomic purposes but  
398 also population genetics, diet analyses, microbiome and parasite research, and should be  
399 routinely collected during field surveys. In groups such as *Presbytis*, faecal samples would be  
400 particularly useful as these animals are shy and many populations are highly threatened.

401

## 402 **Conclusions**

403 We here demonstrate the value of non-invasive faecal samples for addressing taxonomic  
404 questions that are of significant conservation importance. Based on mitochondrial DNA  
405 (mitogenomes, cyt-b and d-loop), we resurrected three species within the *Presbytis femoralis*  
406 group. The new species limits also led to a change in the conservation status of *P. femoralis*  
407 and *P. percura* which now have to be considered Critically Endangered. We further urge  
408 researchers to include the collection of non-invasive faecal samples into their field protocols.

409

## 410 **Materials and Methods**

### 411 *Literature Survey*

412 In order to assess how frequently faecal samples are used for addressing taxonomic questions,  
413 we conducted a survey of mammalian literature for the last 41 years (between 1978-2018).  
414 We downloaded the records pertaining to Supertaxon Mammalia (ST=Mammalia) from

415 *Zoological Record* (articles only). We then identified a subset containing valid mammalian  
416 species names by using the checklist by Burgin et al.<sup>54</sup>. This was done by searching the  
417 binomial name of 6,399 species in the list. We also searched for the genus and species names  
418 separately to include records that utilize genus abbreviations. We then retrieved the studies  
419 that involved DNA/molecular work on faecal samples by searching for the terms  
420 (feces/faeces/fecal/faecal/scat/scats) and  
421 (DNA/barcod/sequenc/molecul/genom/genetic/microsatellite). We lastly retrieved the records  
422 that were classified under Systematics/Taxonomy in the “Broad terms” field and examined  
423 the records manually.

424

#### 425 *Sample Collection, DNA Extraction, and Sequencing*

426 Five faecal samples of *Presbytis femoralis percura* were collected during an eight-day (25  
427 April - 2 May 2018) survey in Riau Province<sup>49</sup>. We also collected one faecal sample believed  
428 to come from *P. siamensis cana* (herein referred as *P. siamensis* cf. *cana*) as the monkeys  
429 were seen on the same tree below which the fresh faecal sample was found. The samples  
430 were preserved following a two-step ethanol-silica method<sup>55</sup> and subsequently stored at a -  
431 20°C freezer at the Andalas University in Sumatra. Genomic DNA was extracted at Andalas  
432 University from 50 mg of faeces using QIAamp® Fast DNA Stool Mini Kit (QIAGEN,  
433 Singapore). DNA was recovered in 30 µl of elution buffer (instead of 200 µl) in order to  
434 obtain a higher concentration of DNA. Each sample was also extracted 2-3 times and later  
435 pooled to recover more genomic DNA. Genomic DNA of these six samples were sent from  
436 Andalas University for Illumina HiSeq 4000 (Illumina Inc., San Diego, CA) sequencing (150  
437 PE) by a commercial provider (NovogeneAIT). A library was constructed for each faecal  
438 sample (fragment size 350 bp) using NEBNext Ultra II DNA Library Prep Kit.

439

#### 440 *Bioinformatics for Obtaining Mitochondrial Genomes*

441 Raw reads generated for *P. f. percura* and *P. s. cana* in this study as well as those for *P. f.*  
442 *femoralis* from Srivathsan et al.<sup>9</sup> were trimmed using Trimmomatic v.0.33<sup>34</sup> under the  
443 following parameters: LEADING:3 TRAILING:3 SLIDINGWINDOW:4:15 MINLEN:50,  
444 and the ILLUMINACLIP parameter was set at 2:30:10<sup>34</sup>. New mitochondrial reference  
445 genomes were assembled for *P. f. percura* and *P. s. cana* using MITObim v.1.9<sup>56</sup> using the  
446 available mitogenome of *P. f. femoralis* (KU899140) from one sample each (ESBL1b and  
447 Pres2). Any redundancy due to circular nature of mitochondrial genome was removed in the  
448 resulting assembly. We then obtained mitochondrial genomes per faecal sample by mapping  
449 the quality-trimmed reads for the sample to the reference genome (ESBL samples to  
450 mitochondrial genome from ESBL1b, Pres2 to Pres2 and BLM1-6 to KU899140). Reads  
451 were mapped using Bowtie2<sup>57</sup> under paired end and -end-to-end mode. The resulting SAM  
452 files were converted to BAM files using SAMtools<sup>58</sup>. Variants were detected using Lofreq<sup>59</sup>  
453 using parameters similar to Isokallio and Stewart<sup>60</sup> with a few more stringent criteria: we  
454 included mapping quality in LoFreq's model and also retained base-alignment quality. We  
455 furthermore applied a minimum allele frequency of 0.2 while filtering the vcf to accept  
456 heteroplasmy only if it was at a frequency of >0.2. Alternate mitochondrial genomes were  
457 reconstructed from the resulting vcf file using gatk<sup>61</sup> FastaAlternateReferenceMaker and  
458 heteroplasmic sites were modified as ambiguous nucleotides using custom script. All  
459 mitochondrial genomes were annotated using MITOS<sup>62</sup>.

460

#### 461 *Phylogenetic Reconstructions and Species Delimitations*

462 The newly reconstructed mitochondrial genomes were combined with publicly available data  
463 from GenBank. For the latter, we downloaded all the mitochondrial sequences for colobine  
464 primates and then retained only the data for Asian colobines. We then curated the GenBank



465 records by consulting the source publication and assessing the locality information provided  
466 in order to update the taxonomic names given that many subspecies are now considered  
467 species. We excluded those sequences for which the source information was incomplete. This  
468 curated set of sequences was used for downstream distance based (Automated Barcode Gap  
469 Discovery, ABGD<sup>36</sup> and Objective Clustering<sup>37</sup> and tree-based species delimitation analyses  
470 (Poisson Tree Processes or PTP)<sup>35</sup>. We also included data for d-loop HV1 obtained by Abdul-  
471 Latiff et al.<sup>28</sup> for *P. f. femoralis*, *P. f. robinsoni* and *P. siamensis siamensis* from Malaysia.  
472 Given that these sequences were not submitted to GenBank, we used Nijman<sup>25</sup>'s  
473 reconstruction of the sequences based on a table that lists all variable sites relative to a  
474 reference sequence.

475 For analyses with PTP, we used three datasets: (1) The Asian colobine mitogenome dataset  
476 based on genomes for Asian colobines (minimum length >10,000 bp). The sequences for the  
477 13 mitochondrial CDS, two ribosomal genes, and complete d-loop sequences were extracted,  
478 aligned, and concatenated. Here, *Colobus guereza* and *Macaca sylvanus* were selected as the  
479 outgroups. (2) A second dataset included the *Presbytis* mitogenome+cyt-b+HV1 dataset. This  
480 dataset covers more samples because *Presbytis* has been well sampled for cyt-b and the  
481 hypervariable region I (HV1) of d-loop (see Meyer et al.<sup>11</sup>). For the analyses of this dataset,  
482 we used *Trachypitecus obscurus* and *T. barbei* as outgroups. (3) The last dataset comprised  
483 HV1 sequences only (*Presbytis* HV1-only dataset). This included HV1 sequences obtained  
484 by Abdul-Latiff et al.<sup>28</sup> for *P. f. femoralis*, *P. f. robinsoni* and *P. s. siamensis*.

485 All coding sequences were aligned in MEGA X<sup>63</sup> based on amino acid translations (using  
486 Clustal). The ribosomal genes and d-loop sequences were aligned using MAFFT LINSI<sup>64</sup>. We  
487 ensured that only distinct haplotypes were retained and only retained the longest sequence if  
488 identical sequences were found. The alignments were concatenated in SequenceMatrix

489 1.7.8<sup>65</sup>. Maximum Likelihood reconstructions were carried out using RAxML v8<sup>66</sup>. For the  
490 mitogenome and the *Presbytis* mitogenome+cyt-b+HV1 datasets, we determined best  
491 partitioning scheme by providing 42 different partitions to PartitionFinder<sup>67</sup> corresponding to  
492 codon position for the 13 coding regions and 3 separate partitions for 12S, 16S and d-loop.  
493 RAxML was run using GTRGAMMA with the resulting partitioning scheme (no partitioning  
494 was done for the HV1 dataset) with 20 independent searches for the best tree.  
495 Multiparametric bootstrapping was conducted applying the automatic bootstopping criterion  
496 (autoMRE). The resulting trees were subjected to PTP-based species delimitation after  
497 excluding outgroups.

498 Distance-based species delimitation utilized ABGD based on uncorrected distances<sup>68</sup>. We  
499 assessed species delimitations under different parameters by varying the slope  $X=0.1$ ,  $X=0.5$   
500 and  $X=1$  ( $X=1.5$  was not applicable to the dataset) and prior intraspecific divergences.  
501 Species delimitation was carried out based on the Asian colobine mitogenome dataset  
502 described above and the *Presbytis* cyt-b and HV1 alignments. The same datasets were also  
503 clustered using Objective Clustering as implemented in Species Identifier (Taxon DNA  
504 1.6.2)<sup>37</sup> at genetic distances of 2.0, 3.0 and 4.0%.

#### 505 *Divergence Dating*

506 Divergence dates between Asian colobine lineages were determined using BEAST v 2.6.0<sup>69</sup>.  
507 We used Asian colobine mitogenome dataset but excluded d-loop for this analyse due its  
508 differing mutational patterns as done for previous studies<sup>11,70</sup>. For divergence estimates, we  
509 included the following genomes to the Asian colobine mitogenome dataset: *Pongo pygmaeus*  
510 (NC\_001646), *Pan troglodytes* (NC\_001643), *Homo sapiens* (NC\_012920), *Chlorocebus*  
511 *aethiops* (NC\_007009), *Macaca sylvanus* (NC\_002764), *Papio hamadryas* (NC\_001992),  
512 *Theropithecus gelada* (NC\_019802). We also did a second analysis for *Presbytis* cyt-b as

513 done by Meyer et al.<sup>11</sup> and used a similar strategy for the various steps. Here, representative  
514 sequences from different Asian colobine genera were included: *Trachypithecus obscurus*  
515 (NC\_006900), *Nasalis larvatus* (NC\_008216), *Rhinopithecus avunculus* (NC\_015485),  
516 *Semnopithecus vetulus* (NC\_019582) in addition to the above-mentioned sequences for fossil-  
517 based calibration. The fossil calibration dates used in this study also followed the dates used  
518 by Meyer et al.<sup>11</sup>. For mitochondrial genomes, we analysed the data using the following  
519 partitioning schemes: by codon (5 partitions: 1,2,3 codon for coding genes, 12S, 16S) and by  
520 gene. We also tested partitioning by both gene and codon, but found the Effective Sample  
521 Size (ESS) to be low for multiple parameters. For cyt-b dataset, we used the 1+2 and 3 codon  
522 partitioning scheme<sup>11</sup>.

523 Divergence estimates were based on a relaxed log normal clock and a Yule prior. Site models  
524 were unlinked across partitions, and a model-averaging approach was used as implemented in  
525 bModelTest<sup>71</sup>. Two independent runs were conducted with 25 million generations with  
526 sampling at every 1000 generations. Tracer v 1.7.1 was used to assess convergence,  
527 LogCombiner 2.6.1 was used to combine the results and 10% burn-in removal was applied.  
528 TreeAnnotator v 2.6.0 was used to summarize the trees.

### 529 *Estimation of Host DNA Content in Faecal Metagenomes*

530 In order to estimate the amount of host nuclear DNA in the faecal metagenomes, we mapped  
531 the metagenomic reads to a colobine reference genome (*Rhinopithecus roxellana*:  
532 GCF\_000769185.1) using bowtie-2 under --end-to-end and ---very-sensitive mode. We next  
533 excluded potentially contaminated reads that could correspond to humans. For this, the  
534 mapped reads were retrieved from the resulting bam files using samtools. These were mapped  
535 back to a combined reference dataset of *R. roxellana* and human genome  
536 (GCF\_000001405.39, GRCh38) using Bowtie2. Resulting BAM file was filtered to exclude

537 reads with any mismatches, and we then excluded all sequences that matched to human  
538 genome only.

539

#### 540 **Ethics Statement**

541 We followed the Code of Best Practices for Field Primatology (2014). All genetic material  
542 were obtained non-invasively through faecal samples; no animals were harmed in the  
543 process. We followed the rules and regulations of the Government of Indonesia and  
544 RISTEKDIKTI (research permit no. 3051/FRP/E5/Dit.KI/IX/2018).

545

#### 546 **References**

- 547 1. IPBES. Summary for policymakers of the global assessment report on biodiversity and  
548 ecosystem services of the Intergovernmental Science-Policy Platform on Biodiversity and  
549 Ecosystem Services. in *The IPBES Global Assessment on Biodiversity and Ecosystem*  
550 *Services* (ed. Díaz, S. *et al.*) (IPBES secretariat, Bonn, Germany (2019).
- 551 2. Sodhi, N. S., Koh, L. P., Brook, B. W. & Ng, P. K. L. Southeast Asian biodiversity: an  
552 impending disaster. *Trends Ecol. Evol.* **19(12)**, 654-660 (2004).
- 553 3. Trimble, M. J. & van Aarde, R. J. Geographical and taxonomic biases in research on  
554 biodiversity in human-modified landscapes. *Ecosphere* **3(12)**, 1-16 (2012).
- 555 4. Titley, M. A., Snaddon, J. L. & Turner, E. C. Scientific research on animal biodiversity is  
556 systematically biased towards vertebrates and temperate regions. *PLoS One* **12(12)**, e0189577  
557 (2017).
- 558 5. Mittermeier, R. A., Rylands, A. B. & Wilson, D. E. *Handbook of the Mammals of the*  
559 *World, Vol. 3, Primates*. Lynx Edicions, Barcelona, Spain (2013).

- 560 6. Mace, G. The role of taxonomy in species conservation. *Phil. Trans. R. Soc. Lond. B Biol.*  
561 *Sci.* **359(1444)**, 711-719 (2004).
- 562 7. Thomson, S. A. *et al.* Taxonomy based on science is necessary for global conservation.  
563 *PLoS Biol.* **16(3)**, e2005075 (2018).
- 564 8. Srivathsan, A., Sha, J., Vogler, A. P. & Meier, R. Comparing the effectiveness of  
565 metagenomics and metabarcoding for diet analysis of a leaf-feeding monkey (*Pygathrix*  
566 *nemaeus*). *Mol. Ecol. Res.* **15(2)**, 250-261 (2015).
- 567 9. Srivathsan, A., Ang, A., Vogler, A. P. & Meier, R. Fecal metagenomics for the  
568 simultaneous assessment of diet, parasites, and population genetics of an understudied  
569 primate. *Front. Zool.* **13**, 17 (2016).
- 570 10. Roos, C. *et al.* An updated taxonomy and conservation status review of Asian primates.  
571 *Asian Primates J.* **4(1)**, 2-38 (2014).
- 572 11. Meyer, D. *et al.* Mitochondrial phylogeny of leaf monkeys with implications for  
573 taxonomy and conservation. *Mol. Phylogenet. Evol.* **59(2)**, 311-319 (2011).
- 574 12. Oates, J. F., Davies, A. G. & Delson, E. The diversity of living colobines. In: Davies, A.  
575 G. & Oates, J. F. (eds). *Colobine Monkey: Their Ecology, Behaviour and Evolution*.  
576 Cambridge University Press (1994).
- 577 13. Nijman, V. Ecology of sympatric and allopatric *Presbytis* and *Trachypithecus* langurs in  
578 Sundaland. in *The Colobines: Natural History, Behaviour and Ecological Diversity*. (eds.  
579 Matsuda, I., Grueter, C. C. & Teichroeb, J. E). (Cambridge University Press, Cambridge, in  
580 press).
- 581 14. IUCN. *The IUCN Red List of Threatened Species*. <https://www.iucnredlist.org> (2008).
- 582 15. Groves, C. P. *Primate Taxonomy*. Smithsonian Institution Press, Washington (2001).

- 583 16. Martin, W. C. L. A monograph of the genus *Semnopithecus* (continued from page 326).  
584 *Mag. Nat. Hist.* **2**, 434-441 (1838).
- 585 17. Raffles, S. T. Descriptive catalogue of a zoological collection made in the island of  
586 Sumatra and its vicinity. *Trans. Linn. Soc. Lond.* **13**, 247 (1821).
- 587 18. Lyon, M. W. Jr. Mammals collected in eastern Sumatra by Dr. W. L. Abbott during 1903,  
588 1906, and 1907: with descriptions on new species and subspecies. *Proc. US Natl. Mus.* **34**,  
589 619-679 (1908).
- 590 19. Thomas, O. A new monkey from the Malay Peninsula. *Proc. Zool. Soc. Lond.* (Abstr. p.  
591 26), 634-635 (1910).
- 592 20. Robinson, H. C. & Kloss, C. B. On six new mammals from the Malay Peninsula and  
593 adjacent islands. *J. Fed. Malay States Mus.* **4(2)**, 169-174 (1911)
- 594 21. Weitzel, V., Yang, C. M. & Groves, C. P. A catalogue of primates in the Singapore  
595 zoological reference collection. *Raffles B. Zool.* **36**, 1-166 (1988).
- 596 22. Ang, A., Srivathsan, A., Md.-Zain, B. M., Ismail, M. R. B. & Meier, R. Low genetic  
597 variability in the recovering urban banded leaf monkey population of Singapore. *Raffles B.*  
598 *Zool.* **60**, 589-594 (2012).
- 599 23. Ang, A. and Boonratana, R. *Presbytis femoralis* ssp. *percura*. In: The IUCN Red List of  
600 Threatened Species 2015 (in press).
- 601 24. Ang, A. *Banded Leaf Monkeys in Singapore: Preliminary Data on Taxonomy, Feeding*  
602 *Ecology, Reproduction, and Population Size*. MSc thesis, National University of Singapore  
603 (2010).
- 604 25. Nijman, V. *Presbytis neglectus* or *P. femoralis*, colobine molecular phylogenies, and  
605 GenBank submission of newly generated DNA sequences. *Folia Primatol.* (2019b).

- 606 26. Md.-Zain, B. M., Morales, J. C., Hassan, M. N., Jasmi, A. & Melnick, D. J. Is *Presbytis* a  
607 distinct monophyletic genus: inferences from mitochondrial DNA sequences. *Asian Primates*  
608 *J.* **1**, 26-36 (2008).
- 609 27. Vun, V. F., Mahani, M. C., Lakim, M., Ampeng, A. & Md.-Zain, B. M. Phylogenetic  
610 relationships of leaf monkeys (*Presbytis*; Colobinae) based on cytochrome b and 12S rRNA  
611 genes. *Genet Mol Res* **10(1)**, 368-381 (2011).
- 612 28. Abdul-Latiff, M. A. B., Baharuddin, H., Abdul-Patah, P. & Md.-Zain, B. M. Is  
613 Malaysia's banded langur, *Presbytis femoralis femoralis*, actually *Presbytis neglectus*  
614 *neglectus*? Taxonomic revision with new insights on the radiation history of the *Presbytis*  
615 species group in Southeast Asia. *Primates* **60(1)**, 63-79 (2019).
- 616 29. Sterner, K. N., Raaum, R. L., Zhang, Y.-P., Stewart, C.-B. & Disotell, T. R.  
617 Mitochondrial data support an odd-nosed colobine clade. *Mol. Phylogenet. Evol.* **40(1)**, 1-7  
618 (2006).
- 619 30. Schlegel, H. Monographie 40: simiae. *Revue Methodique, Museum d'Histoire Naturelle*  
620 *des Pays-Bas* **7**, 1-356 (1876).
- 621 31. Low, M. E. Y. & Lim, K. K. P. The authorship and type locality of the banded leaf  
622 monkey, *Presbytis femoralis*. *Nature Singapore* **8**, 69-71 (2015).
- 623 32. Koepfli, K.-P. *et al.* Establishing the foundation for an applied molecular taxonomy of  
624 otters in Southeast Asia. *Conserv. Genet.* **9**, 1589 (2008).
- 625 33. Markolf, M. *et al.* True lemurs ... true species - species delimitation using multiple data  
626 sources in the brown lemur complex. *BMC Evol. Biol.* **13**, 233 (2013).
- 627 34. Bogler, A. M., Lohse, M. & Usadel, B. Trimmomatic: A flexible trimmer for Illumina  
628 Sequence Data. *Bioinformatics* **30**, 2114-2120 (2014).

- 629 35. Zhang, J., Kapli, P., Pavlidis, P. & Stamatakis, A. A general species delimitation method  
630 with applications to phylogenetic placements. *Bioinformatics* **29**, 2869-2876 (2013).
- 631 36. Puillandre, N., Lambert, A., Brouillet, S. & Achaz, G. ABGD, Automatic Barcode Gap  
632 Discovery for primary species delimitation. *Mol. Ecol.* **21**, 1864-1877 (2012).
- 633 37. Meier, R., Shiyang, K., Vaidya, G. & Ng, P. K. L. DNA barcoding and taxonomy in  
634 Diptera: a tale of high intraspecific variability and low identification success. *Syst. Biol.* **55**,  
635 715-728 (2006).
- 636 38. Wang, X. P. *et al.* Phylogenetic relationships among the colobine monkeys revisited: new  
637 insights from analyses of complete mt genomes and 44 nuclear non-coding markers. *PLoS*  
638 *One* **7(4)**, e36274 (2012).
- 639 39. Napier, J. R. & Napier, P. H. *A Handbook of Living Primates*. Academic Press, London  
640 (1967).
- 641 40. Tilson, R. L. Infant coloration and taxonomic affinity of the Mentawai Islands leaf  
642 monkeys, *Presbytis potenziani*. *J. Mammal.* **57**, 766-769 (1976).
- 643 41. Weitzel, V. A preliminary analysis of the dental and cranial morphology of *Presbytis* and  
644 *Trachypithecus* in relation to diet. MA thesis, Australian National University, Canberra  
645 (1983).
- 646 42. Voris, H. K. Maps of Pleistocene sea levels in Southeast Asia: shorelines, river systems  
647 and time durations. *J Biogeogr* **27**, 1153-1167 (2000).
- 648 43. Slik, J. W. *et al.* Soils on exposed Sunda Shelf shaped biogeographic patterns in the  
649 equatorial forests of Southeast Asia. *PNAS* **108**, 12343-12347 (2011).



- 650 44. Roos, C., Nadler, T. & Walter, L. Mitochondrial phylogeny, taxonomy and biogeography  
651 of the silvered langur species group (*Trachypithecus cristatus*). *Mol. Phylogenet. Evol.* **47**,  
652 629-636 (2008).
- 653 45. Tan, S. H. D., Ali, F., Kutty, S. N. & Meier, R. The need for specifying species concepts:  
654 how many species of silvered langurs (*Trachypithecus cristatus* group) should be recognized?  
655 *Mol. Phylogenet. Evol.* **49**, 688-689 (2008).
- 656 46. Ang, A. Final Report (Phase 1: 2016-2018): Species Action Plan for the Conservation of  
657 Raffles' Banded Langur (*Presbytis femoralis femoralis*) in Malaysia and Singapore.  
658 *Unpublished Report*, Wildlife Reserves Singapore (2018).
- 659 47. Shevade, V. S., Potapov, P. V., Harris, N. L. & Loboda, T. V. Expansion of industrial  
660 plantations continues to threaten Malayan tiger habitat. *Remote Sens.* **9(7)**, 747 (2017).
- 661 48. Shevade, V. S. & Loboda, T. V. Oil palm plantations in Peninsular Malaysia:  
662 Determinants and constraints on expansion. *PLoS One* **14(2)**, e0210628 (2019).
- 663 49. Rizaldi *et al.* Preliminary study on the distribution and conservation status of the East  
664 Sumatran banded langur (*Presbytis femoralis percura*) in Riau Province, Sumatra, Indonesia.  
665 *Asian Primates J.* **8(1)**, 25-36 (2019).
- 666 50. Uryu, Y. *et al.* Sumatra's forests, their wildlife and the climate, windows in time: 1985,  
667 1990, 2000, and 2009. *WWF-Indonesia Technical Report Jakarta Indonesia*. (2010).
- 668 51. World Bank. The cost of fire: An economic analysis of Indonesia's 2015 fire crisis.  
669 *Indonesia Sustainable Landscapes Knowledge Note.* **1** (2016).
- 670 52. Nijman, V. & Manullang, B. *Presbytis melalophos*. In: *The IUCN Red List of Threatened*  
671 *Species 2008*: e.T18129A7666452. Accessed on 12 September 2019 (2008).

- 672 53. Chiou, K. L. & Bergey, C. M. Methylation-based enrichment facilitates low-cost,  
673 noninvasive genomic scale sequencing of populations from feces. *Sci. Rep.* **8**, 1975 (2018).
- 674 54. Burgin, C. J., Colella, J. P., Kahn, P. L. & Upham, N. S. How many species of mammals  
675 are there? *J. Mammal.* **99**, 1-14 (2018).
- 676 55. Nsubuga, A. M. *et al.* Factors affecting amount of genomic DNA extracted from ape  
677 faeces and the identification of an improved sample storage method. *Mol. Ecol.* **13**, 2089-  
678 2094 (2004).
- 679 56. Hahn, C., Bachman, L. & Chevreur, B. Reconstructing mitochondrial genomes directly  
680 from genomic next-generation sequencing reads-a baiting and iterative mapping approach.  
681 *Nucleic Acids Res.* **41**, e129 (2013).
- 682 57. Langmead, B. & Salzberg, S. L. Fast gapped-read alignment with Bowtie 2. *Nat. Methods*  
683 **9**, 357-359 (2012).
- 684 58. Li, H. *et al.* The Sequence Alignment/Map format and SAMtools. *Bioinformatics* **25**,  
685 2078-2079 (2009).
- 686 59. Wilm, A. *et al.* LoFreq: a sequence-quality aware, ultra-sensitive variant caller for  
687 uncovering cell-population heterogeneity from high-throughput sequencing datasets. *Nucleic*  
688 *Acids Res* **40**, 11189-11201 (2012).
- 689 60. Isokallio, M. A. & Stewart, J. Low-frequency variant calling from high-quality mtDNA  
690 sequencing data. *protocols.io* doi: 10.17504/protocols.io.nfkdbkw (2018).
- 691 61. McKenna, A. *et al.* The Genome Analysis Toolkit: a MapReduce framework for  
692 analyzing next-generation DNA sequencing data. *Genome Res.* **20**, 1297-1303 (2010).
- 693 62. Bernt, M. *et al.* MITOS: Improved de novo Metazoan mitochondrial genome annotation.  
694 *Mol. Phylogenet. Evol.* **69**, 313-319 (2013).

- 695 63. Kumar, S., Stecher, G., Li, M., Knyaz, C. & Tamura, K. MEGA X: molecular  
696 evolutionary genetics analysis across computing platforms. *Mol. Biol. Evol.* **35**, 1547-1549  
697 (2018).
- 698 64. Katoh, K., Kuma, K., Hiroyuki, T. & Miyata, T. MAFFT version 5: improvement in  
699 accuracy of multiple sequence alignment. *Nucleic Acids Res.* **33**, 511-518 (2005).
- 700 65. Vaidya, G., Lohman, D. J. & Meier, R. SequenceMatrix: concatenation software for the  
701 fast assembly of multi-gene datasets with character set and codon information. *Cladistics* **27**,  
702 171-180 (2011).
- 703 66. Stamatakis, A. RAxML version 8: a tool for phylogenetic analysis and post-analysis of  
704 large phylogenies. *Bioinformatics* **30**, 1312-1313 (2014).
- 705 67. Lanfear, R., Frandsen, P. B., Wright, A. M., Senfeld, T. & Calcott, B. PartitionFinder 2:  
706 new methods for selecting partitioned models of evolution for molecular and morphological  
707 phylogenetic analyses. *Mol. Biol. Evol.* **34**, 772-773 (2016).
- 708 68. Srivathsan, A. & Meier, R. On the inappropriate use of Kimura-2-parameter (K2P)  
709 divergences in the DNA-barcoding literature. *Cladistics* **28**, 190-194 (2012).
- 710 69. Bouckaert, R. *et al.* BEAST 2: A software platform for Bayesian evolutionary analysis.  
711 *PLoS Comput. Biol.* **10(4)**, e1003537 (2014).
- 712 70. Stone, A. C. *et al.* More reliable estimates of divergence times in Pan using complete  
713 mtDNA sequences and accounting for population structure. *Phil. Trans. R. Soc. Lond. B Biol.*  
714 *Sci.* **365(1556)**, 3277-3288 (2010).
- 715 71. Bouckaert, R. R. & Drummond, A. J. bModelTest: Bayesian phylogenetic site model  
716 averaging and model comparison. *BMC Evol. Biol.* **17**, 42 (2017).

- 717 72. Miller, G. S. Jr. The langurs of the *Presbytis femoralis* group. *J. Mammal.* **15**, 124-137  
718 (1934).
- 719 73. Elliot, D. G. Subgenus *Pygathrix*. In: *A Review of the Primates, Vol. 3*. American  
720 Museum of Natural History, New York (1913).
- 721 74. Miller, G. S. Jr. Fifty-one new Malayan mammals. *Smithsonian Miscellaneous*  
722 *Collections* **61**, 28 (1913).
- 723 75. Pocock, R. I. The monkeys of the genera *Pithecus* (or *Presbytis*) and *Pygathrix* found to  
724 the east of the Bay of Bengal. *Proc. Zool. Soc. Lond.* **104(4)**, 895-961 (1934).
- 725 76. Raven, H. C. *Wallace's Line and the Distribution of Indo-Australian Mammals*. New  
726 York Press (1935).
- 727 77. Chasen, F. N. A handlist of Malayan mammals. *B. Raffles Mus.* **15**, 1-209 (1940).
- 728 78. Hooijer, D. A. Quaternary langurs and macaques from the Malay Archipelago.  
729 Zoologische Verhandelingen Uitgegeven door het Rijksmuseum van Natuurlijke Historie te  
730 Leiden **55**, 1-64 (1962).
- 731 79. Medway, L. The monkeys of Sundaland: ecology and systematics of the cercopithecids of  
732 a humid equatorial environment. In: Napier, J. R. & Napier, P. H. (eds). *Old World Monkeys:*  
733 *Evolution*. Academic Press, New York, 513–553 (1970).
- 734 80. Thorington, R. W. Jr. & Groves, C. P. An annotated classification of the  
735 Cercopithecoidea (1970). In: Napier, J. R. & Napier, P. H. (eds). *Old World Monkeys:*  
736 *Evolution*. Academic Press, New York (1970).
- 737 81. Wilson, C. C. & Wilson, W. L. Behavioral and morphological variations among primate  
738 population in Sumatra. *Yearb. Phys. Anthropol.* **20**, 207-233 (1977).

739 82. Medway, L. *The Wild Mammals of Malaya (Peninsular Malaysia) and Singapore*. Oxford  
740 University Press, Oxford (1983).

741 83. Brandon-Jones, D. Colobus and leaf monkeys. In: MacDonald, I. D. (ed). *Encyclopaedia*  
742 *of Mammals*. George Allen and Unwin, London, 398-408 (1984).

743 84. Napier, P. H. *Catalogue of Primates in the British Museum (Natural History) and*  
744 *elsewhere in the British Isles. Part III: Family Cercopithecidae, Subfamily Colobinae*. British  
745 Museum (Natural History), London (1985).

746 85. Aimi, M. & Bakar, A. Taxonomy and distribution of *Presbytis melalophos* group in  
747 Sumatra, Indonesia. *Primates* **33**, 191-206 (1992).

748 86. Brandon-Jones, D. *et al.* Asian primate classification. *Int. J. Primatol.* **25**, 97-164 (2004).

749 87. Md.-Zain, B. M. Molecular systematic of the genus *Presbytis*. PhD thesis. Columbia  
750 University, New York (2001).

751

## 752 **Acknowledgements**

753 This research was funded by the Wildlife Reserves Singapore Conservation Fund. We would  
754 like to thank the Government of Indonesia and RISTEKDIKTI for the research permit  
755 (3051/FRP/E5/Dit.KI/IX/2018) and the Government of Singapore and National Parks Board  
756 for the research permit (NP/RP16-092). We sincerely appreciate the assistance from Anugrah  
757 Viona Agesi, Wila Karlina, and Dyta Rabbani Aidil of the Genetic and Biomolecular  
758 Laboratory at Andalas University.

759

## 760 **Author Contributions**

761 A.A., A.S., R.M., V.N. wrote the main manuscript text; A.A., A.S., R., R.M., V.N. designed  
762 the study; A.A., R. conducted the field work; A.A., D.R. extracted DNA samples in D.R.'s

763 laboratory; A.S., D.R. conducted bioinformatics analyses; and A.S. reconstructed the time-  
764 tree. All authors reviewed and edited the manuscript and gave final approval for submission.

765

## 766 **Additional Information**

767 The authors declare no competing interests.

768

## 769 **Legends**

770 Figure 1. Distribution of the banded langur *Presbytis femoralis* on the Malay Peninsula and  
771 eastern Sumatra. Map: Ang Yuchen

772

773 Figure 2. Three subspecies of *Presbytis femoralis*; clockwise from East Sumatran banded  
774 langur *P. f. percura* (1), Raffles' banded langur *P. f. femoralis* (2), to Robinson's banded  
775 langur *P. f. robinsoni* (3). Photos: Andie Ang

776

777 Figure 3. Dated phylogeny of Asian colobine primates based on mitochondrial genomes. The  
778 values at nodes represent posterior probability (codon partitioning)/ML bootstrap support for  
779 relationships between Asian colobines. Values are omitted if both BI and ML support values  
780 are  $<0.7/70$ , while \* represents support of 1/100. The bars represent the 95% confidence  
781 intervals for divergence times estimates.

782

783 Figure 4. ML reconstruction of relationships between *Presbytis* species based on  
784 mitogenome+cyt-b+HV1 dataset. Node values represent bootstrap support, values  $<70$  are  
785 excluded, while node support of 100 is represented by \*.

786

787 Figure 5. Nineteen species of *Presbytis* langurs recognised in this study. Photo credits:  
788 Wilson Novarino (1. *P. bicolor*); Brent Loken (2. *P. canicrus*); Chien Lee (3. *P.*  
789 *chrysomelas*); Andie Ang (4. *P. comata*); Andie Ang (5. *P. femoralis*); Milan Janda (6. *P.*  
790 *frontata*); Mark Spence (7. *P. hosei*); Muhammad Azhari Akbar (8. *P. melalophos*); Jonathan  
791 Beilby (9. *P. mitrata*); Martjan Lammertink (10. *P. natunae*); Andie Ang (11. *P. percura*);  
792 SwaraOwa (12. *P. potenziati*); Andie Ang (13. *P. robinsoni*); David Tan (14. *P. rubicunda*);  
793 Coke and Som Smith (15. *P. sabana*); Lee Zan Hui (16. *P. siamensis*); Gusmardi Indra (17.  
794 *P. siberu*); Thio Hui Bing (18. *P. sumatrana*); Thio Hui Bing (19. *P. thomasi*). Collage credit:  
795 Sabrina Jabbar

796

797 Figure 6. *Presbytis siamensis siamensis* (left; photo: Lee Zan Hui) and *P. s. cana* (right:  
798 Andie Ang).

799

800 Table 1. Morphological characters of three subspecies of *Presbytis femoralis*

801

802 Table 2. Summary of sequencing data and mitochondrial genomes obtained from eleven  
803 *Presbytis* langurs from Singapore and eastern Sumatra.

804

805 Table 3. Summary of results of ABGD-based species delimitation. Values represent number  
806 of molecular Operational Taxonomic Units (mOTUs). N represents number of species  
807 (include those resurrected in this study), X the slope parameter. Colours: green: all  
808 resurrected species are valid. Purple: Supports splitting of the three subspecies of *Presbytis*  
809 *femoralis* and splitting of *P. siamensis* cf. *cana*. However, some sequences of *P. f. femoralis*  
810 from Peninsular Malaysia are split into multiple mOTUs. Orange: Resurrection of all three

811 subspecies of *P. femoralis* is valid, but *P. s. cf. cana* is lumped with other *Presbytis* species.

812 Red: Not valid.

813

814 Table 4. Taxonomic classifications of the type specimens of *femoralis*, *percura*, and

815 *robinsoni* followed by later authors since their first descriptions (non-exhaustive).

816

817 Table 5. Estimation of host DNA content in faecal metagenomes
